# Supplementary material for: Psychiatric Genomics: An Update and an Agenda
Source: Atypon-hosted journal article supplement (doi:10.1176/appi.ajp.2017.17030283), 2017-10-03
Supplement: appi.ajp.2017.17030283.ds001.pdf [file appi.ajp.2017.17030283.ds001.pdf]

# Supplement

## Table of Contents

|                                                      |    |
|------------------------------------------------------|----|
| Figure S1. PGC world map .....                       | 2  |
| Table S1. Definition of terms .....                  | 3  |
| Table S2. PGC papers .....                           | 4  |
| Main papers, primary reports and reviews (N=25)..... | 4  |
| Secondary analysis/methods papers (N=51) .....       | 6  |
| Table S3. Case and control descriptions .....        | 13 |
| References .....                                     | 14 |

Figure S1. PGC world map

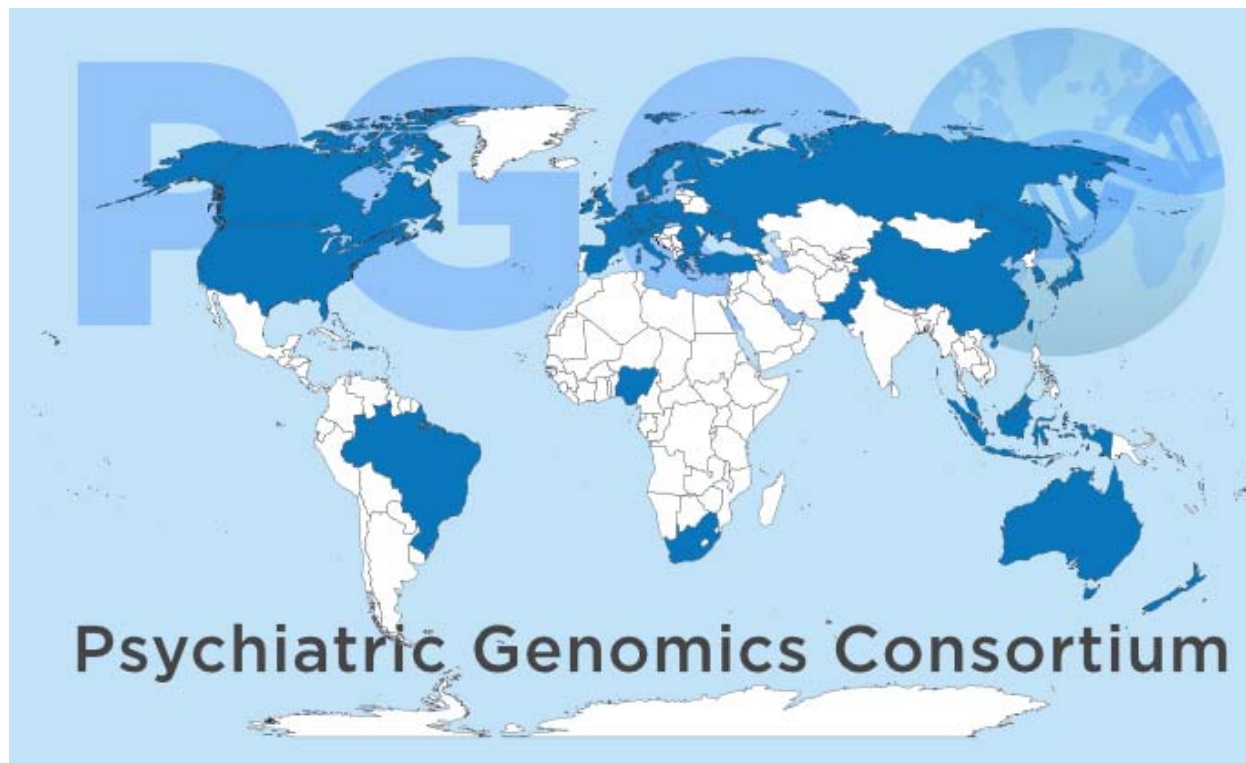

*World map showing the numbers of cases contributed per country. There is an under-representation of subjects from countries in East Asia, central Asia, Africa, and south and central America. Countries with a historical preponderance of European-ancestry population are over-represented.*

Table S1. Definition of terms

| Term                                            | Definition                                                                                                                                                                                                                                                                                                                                  |
|-------------------------------------------------|---------------------------------------------------------------------------------------------------------------------------------------------------------------------------------------------------------------------------------------------------------------------------------------------------------------------------------------------|
| <b>Single-nucleotide polymorphism</b>           | SNP. Specific position where chromosomes carry different nucleic acids. Usually have two variants, which makes them more amenable to genotyping. Polymorphism means frequency is > 1% in a population. There are >10 million SNPs. As they are common, relatively easy to genotype, and widespread, these SNPs are targeted by GWAS arrays. |
| <b>Single-nucleotide variant</b>                | SNV. Essentially the same definition as SNP but can have any frequency. In practice, can be common (>0.01), uncommon (0.001-0.01), rare (<0.001), or ultra-rare (i.e., reported just once in any study).                                                                                                                                    |
| <b>Twin or pedigree heritability</b>            | Twin- $h^2$ , pedigree- $h^2$ . Proportion of the variance in liability of a phenotype (disease, trait) that is due to genes, estimated from risks to twins or to other relatives.                                                                                                                                                          |
| <b>SNP-heritability</b>                         | SNP- $h^2$ . Proportion of the variance in liability of a phenotype (disease, trait) that is due to directly assessed genetic variation, estimated from genome-wide SNP data.                                                                                                                                                               |
| <b>Mendelian disease</b>                        | Caused by a (usually rare) mutation in DNA sequence on one (dominant) or both (recessive) of an individual's pair of chromosomes.                                                                                                                                                                                                           |
| <b>Complex disease</b>                          | Caused by an interaction of multiple genetic and/or environmental factors, does not exhibit classical Mendelian inheritance patterns.                                                                                                                                                                                                       |
| <b>Copy number variant</b>                      | CNV. Chromosomal segment where DNA has been deleted or duplicated. Other structural variants include inversions and translocations.                                                                                                                                                                                                         |
| <b>Common-disease common-variant hypothesis</b> | Genetic risk for common diseases is due to common SNPs.                                                                                                                                                                                                                                                                                     |
| <b>Multiple rare variant hypothesis</b>         | Genetic risk for common disease is due to many different rare SNPs, especially in protein coding or gene regulatory regions.                                                                                                                                                                                                                |
| <b>Linkage disequilibrium</b>                   | LD. Correlation between two SNPs that are close together (an allele of one SNP is usually inherited with a specific allele from a second SNP). LD makes GWAS possible: a carefully selected subset of SNPs contains information about many others.                                                                                          |
| <b>Genome-wide association study</b>            | GWAS. A systematic search for common SNPs that influence a disease or trait, using a genome-wide SNP array for typing a cohort of individuals. Current arrays also provide information about large CNVs.                                                                                                                                    |
| <b>Genome-wide SNP array</b>                    | A system for assaying hundreds of thousands or millions of SNPs for an individual subject. Can now be done inexpensively (<\$US 50) and at high throughput (5,000 subjects per week is readily attainable).                                                                                                                                 |

Updated from Table 1 in reference (1).

## Table S2. PGC papers

### Main papers, primary reports and reviews (N=25)

1. Agrawal A, Edenberg HJ, Gelernter J. Meta-analyses of genome-wide association data hold new promise for addiction genetics. *J Stud Alcohol Drugs*. 2016;77:676-680.
2. Duncan, L.E., Yilmaz, Z., Gaspar, H., Walters, R., Goldstein, J., Antilla, V., Bulik-Sullivan, B., Ripke, S., Eating Disorders Working Group of the Psychiatric Genomics Consortium, Thornton, L.M., Hinney, A., Daly, M.J., Sullivan, P.F., Zeggini, E., Breen, G., Bulik, C.M. Genome-wide association study reveals first locus for anorexia nervosa and metabolic correlations. *Am J Psychiatry*. In press.
3. Breen G, Li Q, Roth BL, O'Donnell P, Didriksen M, Dolmetsch R, O'Reilly PF, Gaspar HA, Manji H, Huebel C, Kelsoe JR, Malhotra D, Bertolino A, Posthuma D, Sklar P, Kapur S, Sullivan PF, Collier DA, Edenberg HJ. Translating genome-wide association findings into new therapeutics for psychiatry. *Nat Neurosci*. 2016;19:1392-1396.
4. CNV Working Group of the Psychiatric Genomics Consortium, Schizophrenia Working Groups of the Psychiatric Genomics Consortium. Contribution of copy number variants to schizophrenia from a genome-wide study of 41,321 subjects. *Nat Genet*. 2016;49:27-35.
5. Corvin A, Sullivan PF. What next in schizophrenia genetics for the Psychiatric Genomics Consortium? *Schizophr Bull*. 2016;42:538-541.
6. Cross Disorder Phenotype Group of the Psychiatric GWAS Consortium. Dissecting the phenotype in genome-wide association studies of psychiatric illness. *Br J Psychiatry*. 2009;195:97-99.
7. Cross-Disorder Group of the Psychiatric Genomics Consortium. Identification of risk loci with shared effects on five major psychiatric disorders: a genome-wide analysis. *Lancet*. 2013;381:1371-1379.
8. Cross-Disorder Group of the Psychiatric Genomics Consortium. Genetic relationship between five psychiatric disorders estimated from genome-wide SNPs. *Nat Genet*. 2013;45:984-994.
9. Direk N, Williams S, Smith JA, Ripke S, Air T, Amare AT, Amin N, Baune BT, Bennett DA, Blackwood DH, Boomsma D, Breen G, Buttenschøn HN, Byrne EM, Børglum AD, Castelao E, Cichon S, Clarke T-K, Cornelis MC, Dannlowski U, Jager PLD, Demirkan A, Domenici E, Duijn CMv, Dunn EC, Eriksson JG, Esko T, Faul JD, Ferrucci L, Fornage M, Geus Ed, Gill M, Gordon SD, Grabe HJ, Grootheest Gv, Hamilton SP, Hartman CA, Heath AC, Hek K, Hofman A, Homuth G, Horn C, Hottenga JJ, Kardina SL, Kloiber S, Koenen K, Kutalik Z, Ladwig K-H, Lahti J, Levinson DF, Lewis CM, Lewis G, Li QS, Llewellyn DJ, Lucae S, Lunetta KL, MacIntyre DJ, Madden P, Martin NG, McIntosh AM, Metspalu A, Milaneschi Y, Montgomery GW, Mors O, Jr THM, Murabito JM, Müller-Myhsok B, Nöthen MM, Nyholt DR, O'Donovan MC, Penninx BW, Pergadia MR, Perlis R, Potash JB, Preisig M, Purcell SM, Quiroz JA, Rääkkönen K, Rice JP, Rietschel M, Rivera M, Schulze TG, Shi J, Shyn S, Sinnamoni GC, Smit JH, Smoller JW, Snieder H, Tanaka T, Tansey KE, Teumer A, Uher R, Umbricht D, Auwera SVD, Ware EB, Weir DR, Weissman MM, Willemsen G, Yang J, Zhao W, Tiemeier H, Sullivan PF. An analysis of two genome-wide association meta-analyses identifies a new locus for broad depression phenotype. *Biol Psychiatry*. 2016.
10. Duncan L, Ratanatharathorn A, Aiello A, Almlí L, Amstadter A, Ashley-Koch A, Baker D, Beckham J, Bierut L, Bisson J, Bradley B, Chen C, Dalvie S, Farrer L, Galea S, Garrett M, Gelernter J, Guffanti G, Hauser M, Johnson E, Kessler R, Kimbrel N, King A, Koen N, Kranzler H, Logue M, Maihofer A, Martin A, Miller M, Morey R, Nugent N, Rice J, Ripke S, Roberts A, Saccone N, Smoller J, Stein D, Stein M, Sumner J, Uddin M, Ursano R, Wildman D, Yehuda R, Zhao H, The Mid-Atlantic Mental Illness Research Education and Clinical Center Workgroup, Daly M, Liberzon I, Ressler K, Nievergelt C, Koenen K, PTSD Working

Group of the Psychiatric Genomics Consortium. Largest GWAS of PTSD (N=20,070) yields genetic overlap with schizophrenia and sex differences in heritability. *Mol Psychiatry*. In press.

11. Franke B, Stein J, Ripke S, Anttila V, Hibar DP, van Hulzen KJ, Vasquez AA, Smoller JW, Nichols TE, Neale MC, McIntosh A, Lee PC, McMahon F, Meyer-Lindenberg A, Mattheisen M, Andreassen O, Gruber O, Sachdev PS, Roiz-Santianez R, Saykin AJ, Ehrlich S, Mather KA, Turner J, Schwartz E, Thalamuthu A, Yoo Y, Martin NG, Wright MJ, Schizophrenia Working Group of the Psychiatric Genomics Consortium, ENIGMA Consortium, O'Donovan M C, Thompson P, Neale B, Medland SE, Sullivan PF. Genetic influences on schizophrenia and subcortical brain volumes: large-scale proof-of-concept and roadmap for future studies. *Nat Neurosci*. 2016;19:420-431.
12. Levinson DF, Mostafavi S, Milaneschi Y, Rivera M, Ripke S, Wray NR, Sullivan PF. Genetic studies of major depressive disorder: why are there no GWAS findings, and what can we do about it. *Biol Psychiatry*. 2014;76:510-512.
13. Logue MW, Amstadter AB, Baker DG, Duncan L, Koenen KC, Liberzon I, Miller MW, Morey RA, Nievergelt CM, Ressler KJ, Smith AK, Smoller JW, Stein MB, Sumner JA, Uddin M. The Psychiatric Genomics Consortium Posttraumatic Stress Disorder Workgroup: Posttraumatic stress disorder enters the age of large-scale genomic collaboration. *Neuropsychopharmacol*. 2015;40:2287-2297.
14. Major Depressive Disorder Working Group of the PGC. A mega-analysis of genome-wide association studies for major depressive disorder. *Mol Psychiatry*. 2013;18:497-511.
15. Neale BM, Medland SE, Ripke S, Asherson P, Franke B, Lesch KP, Faraone SV, Nguyen TT, Schafer H, Holmans P, Daly M, Steinhausen HC, Freitag C, Reif A, Renner TJ, Romanos M, Romanos J, Walitza S, Warnke A, Meyer J, Palmason H, Buitelaar J, Vasquez AA, Lambregts-Rommelse N, Gill M, Anney RJ, Langely K, O'Donovan M, Williams N, Owen M, Thapar A, Kent L, Sergeant J, Roeyers H, Mick E, Biederman J, Doyle A, Smalley S, Loo S, Hakonarson H, Elia J, Todorov A, Miranda A, Mulas F, Ebstein RP, Rothenberger A, Banaschewski T, Oades RD, Sonuga-Barke E, McGough J, Nisenbaum L, Middleton F, Hu X, Nelson S, ADHD Working Group of the Psychiatric GWAS Consortium. Meta-analysis of genome-wide association studies of attention-deficit/hyperactivity disorder. *J Am Acad Child Adolesc Psychiatry*. 2010;49:884-897.
16. Network and Pathway Analysis Subgroup of PGC. Psychiatric genome-wide association study analyses implicate neuronal, immune and histone pathways. *Nat Neurosci*. 2015;18:199-209.
17. O'Donovan MC. What have we learned from the Psychiatric Genomics Consortium? *World Psychiatry*. 2015;14:291-293.
18. Power RA, Tansey KE, Buttenschon HN, Cohen-Woods S, Bigdeli T, Hall LS, Kutalik Z, Lee SH, Ripke S, Steinberg S, Teumer A, Viktorin A, Wray NR, Arolt V, Baune BT, Boomsma DI, Borglum AD, Byrne EM, Castelao E, Craddock N, Craig IW, Dannlowski U, Deary IJ, Degenhardt F, Forstner AJ, Gordon SD, Grabe HJ, Grove J, Hamilton SP, Hayward C, Heath AC, Hocking LJ, Homuth G, Hottenga JJ, Kloiber S, Krogh J, Landen M, Lang M, Levinson DF, Lichtenstein P, Lucae S, MacIntyre DJ, Madden P, Magnusson PK, Martin NG, McIntosh AM, Middeldorp CM, Milaneschi Y, Montgomery GW, Mors O, Muller-Myhsok B, Nyholt DR, Oskarsson H, Owen MJ, Padmanabhan S, Penninx BW, Pergadia ML, Porteous DJ, Potash JB, Preisig M, Rivera M, Shi J, Shyn SI, Sigurdsson E, Smit JH, Smith BH, Stefansson H, Stefansson K, Strohmaier J, Sullivan PF, Thomson P, Thorgeirsson TE, Van der Auwera S, Weissman MM, CONVERGE Consortium, CARDIoGRAM Consortium, Gerad Consortium, Breen G, Lewis CM, Major Depressive Disorder Working Group of the Psychiatric Genomics Consortium. Genome-wide association for major depression through age at onset stratification. *Biol Psychiatry*. 2016.

19. Psychiatric GWAS Consortium. A framework for interpreting genome-wide association studies of psychiatric disorders. *Mol Psychiatry*. 2009;14:10-17.
20. Psychiatric GWAS Consortium. Genome-wide association studies: history, rationale, and prospects for psychiatric disorders. *Am J Psychiatry*. 2009;166:540-546.
21. Psychiatric GWAS Consortium Bipolar Disorder Working Group. Large-scale genome-wide association analysis of bipolar disorder identifies a new susceptibility locus near ODZ4. *Nat Genet*. 2011;43:977-983.
22. Schizophrenia Psychiatric Genome-Wide Association Study Consortium. Genome-wide association study identifies five new schizophrenia loci. *Nat Genet*. 2011;43:969-976.
23. Schizophrenia Working Group of the Psychiatric Genomics Consortium. Biological insights from 108 schizophrenia-associated genetic loci. *Nature*. 2014;511:421-427.
24. Sullivan PF. The Psychiatric GWAS Consortium: big science comes to psychiatry. *Neuron*. 2010;68:182-186.
25. Sullivan PF (for 95 PGC PIs), Psychiatric Genomics Consortium. Don't give up on GWAS. *Mol Psychiatry*. 2011;17:2-3.

### Secondary analysis/methods papers (N=51)

1. Andreassen OA, Thompson WK, Schork AJ, Ripke S, Mattingsdal M, Kelsoe JR, Kendler KS, O'Donovan MC, Rujescu D, Werge T, Sklar P, Schizophrenia Working Group of the Psychiatric GWAS Consortium, Psychiatric GWAS Consortium Bipolar Disorder Working Group, Roddey JC, Chen CH, McEvoy L, Desikan RS, Djurovic S, Dale AM. Improved detection of common variants associated with schizophrenia and bipolar disorder using pleiotropy-informed conditional false discovery rate. *PLoS Genet*. 2013;9:e1003455.
2. Arloth J, Bogdan R, Weber P, Frishman G, Menke A, Wagner KV, Balsevich G, Schmidt MV, Karbalai N, Czamara D, Altmann A, Trümbach D, Wurst W, Mehta D, Uhr M, Klengel T, Erhardt A, Carey CE, Conley ED, Major Depressive Disorder Working Group of the PGC, Reupp A, Müller-Myhsok B, Harin AR, Binder EB. Genetic differences in the immediate transcriptome response to stress predict risk-related brain function and psychiatric disorders. *Neuron*. 2015;86:1189-1202.
3. Bigdeli TB, Ripke S, Bacanu SA, Lee SH, Wray NR, Gejman PV, Rietschel M, Cichon S, St Clair D, Corvin A, Kirov G, McQuillin A, Gurling H, Rujescu D, Andreassen OA, Werge T, Blackwood DH, Pato CN, Pato MT, Malhotra AK, O'Donovan MC, Kendler KS, Fanous AH, Schizophrenia Working Group of the Psychiatric Genomics Consortium. Genome-wide association study reveals greater polygenic loading for schizophrenia in cases with a family history of illness. *Am J Med Genet B Neuropsychiatr Genet*. 2016;171B:276-289.
4. Bramon E, Pirinen M, Strange A, Lin K, Freeman C, Bellenguez C, Su Z, Band G, Pearson R, Vukcevic D, Langford C, Deloukas P, Hunt S, Gray E, Dronov S, Potter SC, Tashakkori-Ghanbaria A, Edkins S, Bumpstead SJ, Arranz MJ, Bakker S, Bender S, Bruggeman R, Cahn W, Chandler D, Collier DA, Crespo-Facorro B, Dazzan P, de Haan L, Di Forti M, Dragovic M, Giegling I, Hall J, Iyegbe C, Jablensky A, Kahn RS, Kalaydjieva L, Kravariti E, Lawrie S, Linszen DH, Mata I, McDonald C, McIntosh A, Myin-Germeys I, Ophoff RA, Pariante CM, Paunio T, Picchioni M, Psychiatric Genomics Consortium, Ripke S, Rujescu D, Sauer H, Shaikh M, Sussmann J, Suvisaari J, Tosato S, Touloupoulou T, Van Os J, Walshe M, Weisbrod M, Whalley H, Wiersma D, Blackwell JM, Brown MA, Casas JP, Corvin A, Duncanson A, Jankowski JA, Markus HS,

Mathew CG, Palmer CN, Plomin R, Rautanen A, Sawcer SJ, Trembath RC, Wood NW, Barroso I, Peltonen L, Lewis CM, Murray RM, Donnelly P, Powell J, Spencer CC. A genome-wide association analysis of a broad psychosis phenotype identifies three loci for further investigation. *Biol Psychiatry*. 2014;75:386-397.

5. Bulik-Sullivan BK, Finucane HK, Anttila V, Gusev A, Day FR, ReproGen Consortium, Psychiatric Genomics Consortium, Anorexia Nervosa Genetic Consortium, Duncan L, Perry JRB, Patterson N, Robinson E, Daly MJ, Price AL, Neale BM. An atlas of genetic correlations across human diseases and traits. *Nat Genet*. 2015;47:1236-1241.

6. Bulik-Sullivan BK, Loh P-R, Finucane H, Daly MJ, Patterson N, Price AL, Neale BM. LD Score regression distinguishes confounding from polygenicity in genome-wide association studies. *Nat Genet*. 2015;47:291-295.

7. Byrne EM, Carrilo-Roa T, Meltzer-Brody S, Penninx BWJH, Sallis HM, Viktorin A, Chapman B, Henders AK, Major Depressive Disorder Working Group of the Psychiatric Genomics Consortium, Pergadia ML, Heath AC, Madden PAF, Sullivan PF, Boschloo L, Van Grootheest G, McMahon G, Lawlor DA, Landen M, Lichtenstein P, Magnusson PKE, Evans DM, Montgomery GW, Booma DI, Martin NG, Wray NR. Applying polygenic risk scores to postpartum depression. *Archives of Womens Mental Health*. 2014;17:519-526.

8. Byrne EM, Raheja UK, Stephens SH, Heath AC, Madden PA, Vaswani D, Nijjar GV, Ryan KA, Youssufi H, Gehrman PR, Shuldiner AR, Martin NG, Montgomery GW, Wray NR, Nelson EC, Mitchell BD, Major Depressive Disorder Working Group of the Psychiatric Genomics Consortium, Postolache TT. Seasonality shows evidence for polygenic architecture and genetic correlation with schizophrenia and bipolar disorder. *J Clin Psychiatry*. 2015;76:128-134.

9. Fanous AH, Zhou B, Aggen SH, Bergen SE, Amdur RL, Duan J, Sanders AR, Shi J, Mowry BJ, Olincy A, Amin F, Cloninger CR, Silverman JM, Buccola NG, Byerley WF, Black DW, Freedman R, Dudbridge F, Holmans PA, Ripke S, Gejman PV, Kendler KS, Levinson DF, Schizophrenia Psychiatric GWAS Consortium. Genome-wide association study of clinical dimensions of schizophrenia: polygenic effect on disorganized symptoms. *Am J Psychiatry*. 2012;169:1309-1317.

10. Finucane HK, Bulik-Sullivan BK, Gusev A, Trynka G, Reshef Y, Loh P-R, Anttila V, Xu H, Zang C, Farh K, Ripke S, Day F, ReproGen Consortium, Schizophrenia Working Group of the Psychiatric Genomics Consortium, RACI Consortium, Purcell S, Stahl EA, Lindstrom S, Perry JRB, Okada Y, Raychaudhuri S, Daly M, Patterson N, Neale BM, Price AL. Partitioning heritability by functional category using GWAS summary statistics. *Nature Genetics*. 2015;47:1228-1235.

11. Groen-Blokhuis MM, Middeldorp CM, Kan KJ, Abdellaoui A, van Beijsterveldt CE, Ehli EA, Davies GE, Scheet PA, Xiao X, Hudziak JJ, Hottenga JJ, Neale BM, Boomsma DI, Psychiatric Genomics Consortium ADHD Working Group. Attention-deficit/hyperactivity disorder polygenic risk scores predict attention problems in a population-based sample of children. *J Am Acad Child Adolesc Psychiatry*. 2014;53:1123-1129 e1126.

12. Gusev A, Lee SH, Neale BM, Trynka G, Vilhjalmsson BJ, Finucane H, Xu H, Zang C, Ripke S, Stahl E, Schizophrenia Working Group of the Psychiatric Genomics Consortium, Sweden Schizophrenia Consortium, Kahler A, Hultman CM, Purcell SM, McCarroll SA, Daly M, Pasaniuc B, Sullivan PF, Wray NR, Raychaudhuri S, Price AL. Partitioning heritability of regulatory and cell-type-specific variants across 11 common diseases. *Am J Human Genet*. 2014;95:535-552.

13. Hamshere ML, Walters JT, Smith R, Richards AL, Green E, Grozeva D, Jones I, Forty L, Jones L, Gordon-Smith K, Riley B, O'Neill FA, Kendler KS, Sklar P, Purcell S, Kranz J, Schizophrenia Working Group of the Psychiatric GWAS Consortium, Morris D, Gill M, Holmans P, Craddock N, Corvin A, Owen MJ,

O'Donovan MC. Genome-wide significant associations in schizophrenia to ITIH3/4, CACNA1C and SDCCAG8, and extensive replication of associations reported by the Schizophrenia PGC. Mol Psychiatry. 2013;18:708-712.

14. Han B, Pouget JG, Slowikowski K, Stahl E, Lee CH, Diogo D, Hu X, Park YR, Kim E, Gregersen PK, Dahlqvist SR, Worthington J, Martin J, Eyre S, Klareskog L, Huizinga T, Chen WM, Onengut-Gumuscu S, Rich SS, Major Depressive Disorder Working Group of the Psychiatric Genomics Consortium, Wray NR, Raychaudhuri S. A method to decipher pleiotropy by detecting underlying heterogeneity driven by hidden subgroups applied to autoimmune and neuropsychiatric diseases. Nat Genet. 2016;48:803-810.

15. Hargreaves A, Anney R, O'Dushlaine C, Nicodemus KK, Schizophrenia Working Group of the Psychiatric GWAS Consortium, Gill M, Corvin A, Morris D, Donohoe G. The one and the many: effects of the cell adhesion molecule pathway on neuropsychological function in psychosis. Psychol Med. 2013;44:1-11.

16. Hart AB, Gamaon ER, Engelhardt BE, Sklar P, Hultman CM, Sullivan PF, Neale B, Faraone SV, PGC ADHD Working Group, de Wit H, Cox NJ, Palmer AA. Genetic variation associated with euphorogenic effects of d-amphetamine is associated with diminished risk for schizophrenia and attention deficit hyperactivity disorder. Proc Nat Acad Sci. 2014;111:5968-5973.

17. Hauberg ME, Roussos P, Grove J, Borglum AD, Mattheisen M, Schizophrenia Working Group of the Psychiatric Genomics Consortium. Analyzing the role of micrnas in schizophrenia in the context of common genetic risk variants. JAMA Psychiatry. 2016;73:369-377.

18. Hinney A, Scherag A, Jarick I, Albayrak O, Putter C, Pechlivanis S, Dauvermann MR, Beck S, Weber H, Scherag S, Nguyen TT, Volckmar AL, Knoll N, Faraone SV, Neale BM, Franke B, Cichon S, Hoffmann P, Nothen MM, Schreiber S, Jockel KH, Wichmann HE, Freitag C, Lempp T, Meyer J, Gilsbach S, Herpertz-Dahlmann B, Sinzig J, Lehmkuhl G, Renner TJ, Warnke A, Romanos M, Lesch KP, Reif A, Schimmelmann BG, Hebebrand J, Psychiatric Genomics Consortium: ADHD Subgroup. Genome-wide association study in German patients with attention deficit/hyperactivity disorder. Am J Med Genet B Neuropsychiatr Genet. 2011;156B:888-897.

19. Holland D, Wang Y, Thompson WK, Schork A, Chen CH, Lo MT, Witoelar A, Schizophrenia Working Group of the Psychiatric Genomics Consortium, Enhancing Neuro Imaging Genetics through Meta-Analysis Consortium, Werge T, O'Donovan M, Andreassen OA, Dale AM. Estimating Effect Sizes and Expected Replication Probabilities from GWAS Summary Statistics. Front Genet. 2016;7:15.

20. Ingason A, Giegling I, Hartmann AM, Genius J, Konte B, Friedl M, Schizophrenia Working Group of the Psychiatric Genomics Consortium, Ripke S, Sullivan PF, St Clair D, Collier DA, O'Donovan MC, Mirnics K, Rujescu D. Expression analysis in a rat psychosis model identifies novel candidate genes validated in a large case-control sample of schizophrenia. Translat Psychiatry. 2015;5:e656.

21. Johnson EC, Bjelland DW, Howrigan DP, Abdellaoui A, Cichon S, Breen G, Børghlum A, Degenhardt F, Forstner AJ, Frank J, Genovese G, Heilmann-Heimbach S, Herms S, Hoffman P, Loohuis LMO, Maier W, Mattheisen M, Morris D, Mowry B, Müller-Mhysok B, Neale B, Nenadic I, Nöthen MM, O'Dushlaine C, Rietschel M, Ruderfer D, Rujescu D, Schulze TG, Simonson M, Stahl E, Strohmaier J, Witt SH, Schizophrenia Working Group of the Psychiatric Genomics Consortium, Sullivan PF, Keller MC. No reliable association between runs of homozygosity and schizophrenia in a well-powered replication study. PLoS Genet. 2016;12:e1006343.

22. Keller MC, Simonson MA, Ripke S, Neale BM, Gejman PV, Howrigan DP, Lee SH, Lencz T, Levinson DF, Sullivan PF, The Schizophrenia Psychiatric Genome-Wide Association Study C. Runs of homozygosity implicate autozygosity as a schizophrenia risk factor. PLoS genetics. 2012;8:e1002656.



23. Klein M, van der Voet M, Harich B, van Hulzen KJ, Onnink AM, Hoogman M, Guadalupe T, Zwieters M, Groothuisink JM, Verberkt A, Nijhof B, Castells-Nobau A, Faraone SV, Buitelaar JK, Schenck A, Arias-Vasquez A, Franke B, Psychiatric Genomics Consortium ADHD Working Group. Converging evidence does not support *GIT1* as an ADHD risk gene. *Am J Med Genet B Neuropsychiatr Genet*. 2015.
24. Le Hellard S, Wang Y, Witoelar A, Zuber V, Bettella F, Hugdahl K, Espeseth T, Steen VM, Melle I, Desikan R, Schork AJ, Thompson WK, Dale AM, Djurovic S, Andreassen OA, Schizophrenia Working Group of the Psychiatric Genomics Consortium. Identification of gene loci that overlap between schizophrenia and educational attainment. *Schizophr Bull*. 2016.
25. Lee S, DeCandia T, Ripke S, Yang J, PGC Schizophrenia Working Group, International Schizophrenia Consortium, Molecular Genetics of Schizophrenia Collaboration, Sullivan PF, Goddard ME, Keller M, Visscher PM, Wray NR. Estimating the proportion of variation in susceptibility to schizophrenia captured by common SNPs. *Nat Genet*. 2012;44:247-250.
26. Lee SH, Byrne EM, Hultman CM, Kahler A, Vinkhuyzen AA, Ripke S, Andreassen OA, Frisell T, Gusev A, Hu X, Karlsson R, Mantzioris VX, McGrath JJ, Mehta D, Stahl EA, Zhao Q, Kendler KS, Sullivan PF, Price AL, O'Donovan M, Okada Y, Mowry BJ, Raychaudhuri S, Wray NR, Schizophrenia Working Group of the Psychiatric Genomics Consortium, International Rheumatoid Arthritis Consortium. New data and an old puzzle: the negative association between schizophrenia and rheumatoid arthritis. *Int J Epidemiol*. 2015;44:1706-1721.
27. Levinson DF, Shi J, Wang K, Oh S, Riley B, Pulver A, Wildenauer DB, Laurent C, Mowry BJ, Gejman PV, Owen MJ, Kendler KS, Nestadt G, Schwab SG, Mallet J, Nertney D, Sanders AR, Williams NM, Wormley B, Lasseter VK, Albus M, Godard-Bauché S, Alexander M, Duan J, O'Donovan M C, Walsh D, O'Neill A, Papadimitriou GN, Dikeos D, Maier W, Lerer B, Campion D, Cohen D, Jay M, Fanous A, Eichhammer P, Silverman JM, Norton N, Zhang N, Hakonarson H, Gao C, Citri A, Hansen M, Ripke S, PGC Schizophrenia Working Group, Dudbridge F, Holmans PA. Genome-wide association study of multiplex schizophrenia pedigrees. *Am J Psychiatry*. 2012;169:963-973.
28. Loh P-R, Bhatia G, Gusev A, Finucane HK, Bulik-Sullivan BK, Pollack SJ, Schizophrenia Working Group of the Psychiatric Genomics Consortium, de Candia TR, Lee SH, Wray NR, Kendler KS, O'Donovan MC, Neale BM, Patterson N, Price AL. Contrasting regional architectures of schizophrenia and other complex diseases using fast variance components analysis. *Nat Genet*. 2015;47:1385-1392.
29. Maier R, Moser G, Chen GB, Ripke S, Cross-Disorder Group of the Psychiatric GWAS Consortium, Coryell W, Potash JB, Scheftner WA, Shi J, Weissman MM, Hultman CM, Landen M, Levinson DF, Kendler KS, Smoller JW, Wray NR, Lee SH. Joint analysis of psychiatric disorders increases accuracy of risk prediction for schizophrenia, bipolar disorder, and major depressive disorder. *Am J Hum Genet*. 2015;96:283-294.
30. Mehta D, Tropf FC, Gratten J, Bakshi A, Zhu Z, Bacanu SA, Hemani G, Magnusson PK, Barban N, Esko T, Metspalu A, Snieder H, Mowry BJ, Kendler KS, Yang J, Visscher PM, McGrath JJ, Mills MC, Wray NR, Lee SH, Schizophrenia Working Group of the Psychiatric Genomics Consortium, LifeLines Cohort Study TwinsUK, Andreassen OA, Bramon E, Bruggeman R, Buxbaum JD, Cairns MJ, Cantor RM, Cloninger CR, Cohen D, Crespo-Facorro B, Darvasi A, DeLisi LE, Dinan T, Djurovic S, Donohoe G, Drapeau E, Escott-Price V, Freimer NB, Georgieva L, de Haan L, Henskens FA, Joa I, Julia A, Khrunin A, Lerer B, Limborska S, Loughland CM, Macek M, Jr., Magnusson PK, Marsal S, McCarley RW, McIntosh AM, McQuillin A, Melegh B, Michie PT, Morris DW, Murphy KC, Myin-Germeys I, Olincy A, Van Os J, Pantelis C, Posthuma D, Quedsted D, Schall U, Scott RJ, Seidman LJ, Toncheva D, Tooney PA, Waddington J, Weinberger DR,

Weiser M, Wu JQ. Evidence for genetic overlap between schizophrenia and age at first birth in women. JAMA Psychiatry. 2016;73:497-505.

31. Middeldorp CM, Hammerschlag AR, Ouwens KG, Groen-Blokhuis MM, St Pourcain B, Greven CU, Pappa I, Tiesler CM, Ang W, Nolte IM, Vilor-Tejedor N, Bacelis J, Ebejer JL, Zhao H, Davies GE, Ehli EA, Evans DM, Fedko IO, Guxens M, Hottenga JJ, Hudziak JJ, Jugessur A, Kemp JP, Krapohl E, Martin NG, Murcia M, Myhre R, Ormel J, Ring SM, Standl M, Stergiakouli E, Stoltenberg C, Thiering E, Timpson NJ, Trzaskowski M, van der Most PJ, Wang C, Early Genetics Lifecourse Epidemiology Consortium, Psychiatric Genomics Consortium ADHD Working Group, Nyholt DR, Medland SE, Neale B, Jacobsson B, Sunyer J, Hartman CA, Whitehouse AJ, Pennell CE, Heinrich J, Plomin R, Davey Smith G, Tiemeier H, Posthuma D, Boomsma DI. A Genome-wide association meta-analysis of attention-deficit/hyperactivity disorder symptoms in population-based pediatric cohorts. J Am Acad Child Adolesc Psychiatry. 2016;55:896-905 e896.

32. Nicodemus KK, Hargreaves A, Morris D, Anney R, Gill M, Corvin A, Donohoe G, Schizophrenia Working Group of the Psychiatric GWAS Consortium. Variability in working memory performance explained by epistasis vs polygenic scores in the ZNF804A pathway. JAMA Psychiatry. 2014;71:778-785.

33. Nurnberger JI, Jr., Koller DL, Jung J, Edenberg HJ, Foroud T, Guella I, Vawter MP, Kelsoe JR, Psychiatric GWAS Consortium Bipolar Disorder Working Group. Identification of pathways for bipolar disorder: a meta-analysis. JAMA Psychiatry. 2014;71:657-664.

34. Pers TH, Timshel P, Ripke S, Lent S, Sullivan PF, O'Donovan MC, Franke L, Hirschhorn JN, Schizophrenia Working Group of the Psychiatric Genomics Consortium. Comprehensive analysis of schizophrenia-associated loci highlights ion channel pathways and biologically plausible candidate causal genes. Hum Mol Genet. 2016;25:1247-1254.

35. Peyrot WJ, Lee SH, Milaneschi Y, Abdellaoui A, Byrne EM, Esko T, de Geus EJ, Hemani G, Hottenga JJ, Kloiber S, Levinson DF, Lucae S, Major Depressive Disorder Working Group of the Psychiatric Genomics Consortium, Martin NG, Medland SE, Metspalu A, Milani L, Noethen MM, Potash JB, Rietschel M, Rietveld CA, Ripke S, Shi J, Social Science Genetic Association Consortium, Willemsen G, Zhu Z, Boomsma DI, Wray NR, Penninx BW. The association between lower educational attainment and depression owing to shared genetic effects? Results in ~25 000 subjects. Mol Psychiatry. 2015;20:735-743.

36. Pouget JG, Goncalves VF, Schizophrenia Working Group of the Psychiatric Genomics Consortium, Spain SL, Finucane HK, Raychaudhuri S, Kennedy JL, Knight J. Genome-wide association studies suggest limited immune gene enrichment in schizophrenia compared to 5 autoimmune diseases. Schizophr Bull. 2016;42:1176-1184.

37. Power RA, Keller MC, Ripke S, Abdellaoui A, Wray NR, Sullivan PF, MDD PGC Working Group, Breen G. A recessive genetic model and runs of homozygosity in major depressive disorder. Am J Med Genet B Neuropsychiatr Genet. 2014;165B:157-166.

38. Prins BP, Abbasi A, Wong A, Vaez A, Nolte I, Franceschini N, Stuart PE, Guterriez Achury J, Mistry V, Bradfield JP, Valdes AM, Bras J, Shatunov A, Page Consortium, International Stroke Genetics Consortium, Systemic Sclerosis c, Treat OAc, Consortium D, Consortium CAD, consortium ALS, International Parkinson's Disease Genomics C, Autism Spectrum Disorder Working Group of the Psychiatric Genomics Consortium, consortium CK, Consortium G, International Consortium for Blood P, Schizophrenia Working Group of the Psychiatric Genomics Consortium, Inflammation Working Group of the Charge Consortium, Lu C, Han B, Raychaudhuri S, Bevan S, Mayes MD, Tsoi LC, Evangelou E, Nair RP, Grant SF, Polychronakos C, Radstake TR, van Heel DA, Dunstan ML, Wood NW, Al-Chalabi A, Dehghan A, Hakonarson H, Markus HS, Elder JT, Knight J, Arking DE, Spector TD, Koeleman BP, van Duijn CM, Martin J, Morris AP, Weersma

- RK, Wijmenga C, Munroe PB, Perry JR, Pouget JG, Jamshidi Y, Snieder H, Alizadeh BZ. Investigating the causal relationship of c-reactive protein with 32 complex somatic and psychiatric outcomes: a large-scale cross-consortium mendelian randomization study. *PLoS Med.* 2016;13:e1001976.
39. Riglin L, Collishaw S, Thapar AK, Dalsgaard S, Langley K, Smith GD, Stergiakouli E, Maughan B, O'Donovan MC, Thapar A. Association of genetic risk variants with attention-deficit/hyperactivity disorder trajectories in the general population. *JAMA Psychiatry.* 2016;73:1285-1292.
40. Ruderfer DM, Fanous AH, Ripke S, McQuillin A, Amdur RL, Schizophrenia Working Group of the Psychiatric Genomics Consortium, Bipolar Disorder Working Group of the Psychiatric Genomics Consortium, Cross-Disorder Working Group of the Psychiatric Genomics Consortium, Gejman PV, O'Donovan MC, Andreassen OA, Djurovic S, Hultman CM, Kelsoe JR, Jamain S, Landen M, Leboyer M, Nimgaonkar V, Nurnberger J, Smoller JW, Craddock N, Corvin A, Sullivan PF, Holmans P, Sklar P, Kendler KS. Polygenic dissection of diagnosis and clinical dimensions of bipolar disorder and schizophrenia. *Mol Psychiatry.* 2014; 9(9):1017-24.
41. Schork AJ, Thompson WK, Pham P, Torkamani A, Roddey JC, Sullivan PF, Kelsoe JR, O'Donovan MC, Furberg H, Tobacco, Genetics C, Bipolar Disorder Psychiatric Genomics Consortium, Schizophrenia Psychiatric Genomics Consortium, Schork NJ, Andreassen OA, Dale AM. All SNPs are not created equal: genome-wide association studies reveal a consistent pattern of enrichment among functionally annotated SNPs. *PLoS Genet.* 2013;9:e1003449.
42. Sekar A, Bialas AR, de Rivera H, Davis A, Hammond TR, Kamitaki N, Tooley K, Presumey J, Baum M, Van Doren V, Genovese G, Rose SA, Handsaker RE, Schizophrenia Working Group of the Psychiatric Genomics Consortium, Daly MJ, Carroll MC, Stevens B, McCarroll SA. Schizophrenia risk from complex variation of complement component 4. *Nature.* 2016;530:177-183.
43. Srinivasan S, Bettella F, Mattingsdal M, Wang Y, Witoelar A, Schork AJ, Thompson WK, Zuber V, Schizophrenia Working Group of the Psychiatric Genomics Consortium, The International Headache Genetics Consortium, Winsvold BS, Zwart JA, Collier DA, Desikan RS, Melle I, Werge T, Dale AM, Djurovic S, Andreassen OA. Genetic markers of human evolution are enriched in schizophrenia. *Biol Psychiatry.* 2016;80:284-292.
44. Stergiakouli E, Hamshere M, Holmans P, Langley K, Zaharieva I, Hawi Z, Kent L, Gill M, Williams N, Owen MJ, O'Donovan M, Thapar A. Investigating the contribution of common genetic variants to the risk and pathogenesis of ADHD. *Am J Psychiatry.* 2012;169:186-94
45. Thompson WK, Wang Y, Schork AJ, Witoelar A, Zuber V, Xu S, Werge T, Holland D, Schizophrenia Working Group of the Psychiatric Genomics Consortium, Andreassen OA, Dale AM. An empirical Bayes mixture model for effect size distributions in genome-wide association studies. *PLoS Genet.* 2015;11:e1005717.
46. van Scheltinga AF, Bakker SC, van Haren NE, Derks EM, Buizer-Voskamp JE, Boos HB, Cahn W, Hulshoff Pol HE, Ripke S, Ophoff RA, Kahn RS, Schizophrenia Working Group of the Psychiatric GWAS Consortium. Genetic schizophrenia risk variants jointly modulate total brain and white matter volume. *Biol Psychiatry.* 2013;73:525-531.
47. van Scheltinga AF, Bakker SC, van Haren NE, Derks EM, Buizer-Voskamp JE, Cahn W, Ripke S, Schizophrenia Working Group of the Psychiatric GWAS Consortium, Ophoff RA, Kahn RS. Schizophrenia genetic variants are not associated with intelligence. *Psychol Med.* 2013;43:2563-2570.
48. Vilhjalmsson BJ, Yang J, Finucane HK, Gusev A, Lindstrom S, Ripke S, Genovese G, Loh PR, Bhatia G, Do R, Hayeck T, Won HH, Schizophrenia Working Group of the Psychiatric Genomics Consortium,

Discovery Biology Risk of Inherited Variants in Breast Cancer Study, Kathiresan S, Pato M, Pato C, Tamimi R, Stahl E, Zaitlen N, Pasaniuc B, Belbin G, Kenny EE, Schierup MH, De Jager P, Patsopoulos NA, McCarroll S, Daly M, Purcell S, Chasman D, Neale B, Goddard M, Visscher PM, Kraft P, Patterson N, Price AL. Modeling linkage disequilibrium increases accuracy of polygenic risk scores. Am J Hum Genet. 2015;97:576-592.

49. Wang Y, Thompson WK, Schork AJ, Holland D, Chen CH, Bettella F, Desikan RS, Li W, Witoelar A, Zuber V, Devor A, Bipolar D, Schizophrenia Working Group of the Psychiatric Genomics Consortium, Enhancing Neuro Imaging Genetics through Meta Analysis Consortium, Nothen MM, Rietschel M, Chen Q, Werge T, Cichon S, Weinberger DR, Djurovic S, O'Donovan M, Visscher PM, Andreassen OA, Dale AM. Leveraging genomic annotations and pleiotropic enrichment for improved replication rates in schizophrenia GWAS. PLoS Genet. 2016;12:e1005803.

50. Yang L, Neale BM, Liu L, Lee SH, Wray NR, Ji N, Li H, Qian Q, Wang D, Psychiatric GWAS Consortium: ADHD Subgroup, Li J, Faraone SV, Wang Y, Doyle AE, Reif A, Rothenberger A, Franke B, Sonuga-Barke EJ, Steinhausen HC, Buitelaar JK, Kuntsi J, Biederman J, Lesch KP, Kent L, Asherson P, Oades RD, Loo SK, Nelson SF, Smalley SL, Banaschewski T, Arias Vasquez A, Todorov A, Charach A, Miranda A, Warnke A, Thapar A, Cormand B, Freitag C, Mick E, Mulas F, Middleton F, Hakonarson H, Palmason H, Schafer H, Roeyers H, McGough JJ, Romanos J, Crosbie J, Meyer J, Ramos-Quiroga JA, Sergeant J, Elia J, Langely K, Nisenbaum L, Romanos M, Daly MJ, Ribases M, Gill M, O'Donovan M, Owen M, Casas M, Bayes M, Lambregts-Rommelse N, Williams N, Holmans P, Anney RJ, Ebstein RP, Schachar R, Medland SE, Ripke S, Walitza S, Nguyen TT, Renner TJ, Hu X. Polygenic transmission and complex neuro developmental network for attention deficit hyperactivity disorder: genome-wide association study of both common and rare variants. Am J Med Genet B Neuropsychiatr Genet. 2013;162B:419-430.

51. Zeng Y, Navarro P, Fernandez-Pujals AM, Hall LS, Clarke TK, Thomson PA, Smith BH, Hocking LJ, Padmanabhan S, Hayward C, MacIntyre DJ, Wray NR, Major Depressive Disorder Working Group of the Psychiatric Genomics Consortium, Deary IJ, Porteous DJ, Haley CS, McIntosh AM. A combined pathway and regional heritability analysis indicates NETRIN1 pathway is associated with major depressive disorder. Biol Psychiatry. 2017;8:336-346.

Table S3. Case and control descriptions

| Group             | N <sub>case</sub> | Brief description                                                                                                                                                                                                                                                                                                                                                                                                                                                                          |
|-------------------|-------------------|--------------------------------------------------------------------------------------------------------------------------------------------------------------------------------------------------------------------------------------------------------------------------------------------------------------------------------------------------------------------------------------------------------------------------------------------------------------------------------------------|
| <b>ADHD (2)</b>   | 39K               | <b>Diagnosis:</b> DSM-IV/ICD-10 ADHD, structured interviews, national treatment/pharmacy registers, or validated web instruments (new samples: iPSYCH). Includes PGC study quality review. <b>Ascertainment:</b> clinical or national register. <b>Phenotypes:</b> severity, symptoms, age onset, comorbidity.                                                                                                                                                                             |
| <b>AN (3)</b>     | 50K               | <b>Diagnosis:</b> DSM-IV AN (excluding amenorrhea), structured interviews (new samples: ANGI & Charlotte's Helix). Includes PGC study quality review. <b>Ascertainment:</b> clinical or national register. <b>Phenotypes:</b> severity, symptoms, bingeing, purging, lowest/highest BMI, age onset, comorbidity.                                                                                                                                                                           |
| <b>AUT (4)</b>    | 40K               | <b>Diagnosis:</b> DSM-IV ASD, structured interviews (ADI-R and/or ADOS), national register samples (clinic-based, validated with ADI-R/ADOS). Includes PGC study quality review. <b>Ascertainment:</b> clinical or national register. <b>Phenotypes:</b> symptoms, severity, ADI-R/ADOS elements, IQ/comorbid ID.                                                                                                                                                                          |
| <b>BIP (5)</b>    | 49K               | <b>Diagnosis:</b> DSM-IV BIP1 or BIP2, structured interviews or validated national treatment or quality assurance registers. Includes PGC study quality review. <b>Ascertainment:</b> clinical or national register. <b>Phenotypes:</b> severity, symptoms, age onset, cognition, brain MRI.                                                                                                                                                                                               |
| <b>MDD (6)</b>    | 100K              | <b>Diagnosis:</b> DSM-IV MDD, structured interviews, national treatment/pharmacy registers, or validated web instruments (new samples: iPSYCH & UK Biobank, Q1 2016). Includes PGC study quality review. <b>Ascertainment:</b> clinical or national register. <b>Phenotypes:</b> severity, symptoms, age onset, recurrence, comorbidity, sex abuse.                                                                                                                                        |
| <b>OCD/TS (7)</b> | 34K               | <b>Diagnosis:</b> DSM-IV OCD or TS, structured interviews, national treatment registers, or validated web instruments (new samples: iPSYCH & funded collections). Includes PGC study quality review. <b>Ascertainment:</b> clinical or national register. <b>Phenotypes:</b> severity, symptoms, age onset, comorbidity.                                                                                                                                                                   |
| <b>PTSD (8)</b>   | 75K               | <b>Diagnosis:</b> DSM-IV PTSD, structured interviews, national treatment/pharmacy registers, or validated web instruments (new samples: DK Soldier). Includes PGC study quality review. <b>Ascertainment:</b> clinical, Army STARRS, or national register. <b>Controls</b> are trauma-exposed & separate from other PGC groups. <b>Phenotypes:</b> trauma details, severity, symptoms, age onset, comorbidity, trauma history.                                                             |
| <b>SCZ (9)</b>    | 100K              | <b>Diagnosis:</b> DSM-IV SCZ or SAD, structured interviews or validated national treatment/pharmacy registers (new samples: CLOZUK-v3, China, EUGEI). Includes PGC study quality review. <b>Ascertainment:</b> clinical or national register. <b>Phenotypes:</b> pos/neg symptoms, age onset, cognition, environmental exposures, brain MRI.                                                                                                                                               |
| <b>SUD</b>        | 60K               | <b>Diagnosis:</b> DSM-IV cannabis, opioid, cocaine, nicotine and alcohol use disorders (new samples: "SmokeScreen", UK Biobank, other PGC). Includes PGC study quality review. <b>Ascertainment:</b> clinical or national register. <b>Phenotypes:</b> severity, quantity/frequency, symptoms, age onset, recurrence, craving, IV, poly-drug.                                                                                                                                              |
| <b>Controls</b>   | †                 | <b>Diagnosis:</b> For common disorders ( $K_P > 0.01$ ), screened for absence of case definition, and for some studies, exposure. For uncommon/rare disorders, most screened & a few unscreened; although the power implications are small (10), we test this carefully. Includes PGC study quality review. <b>Ascertainment:</b> most case collections have controls from population or national registers. <b>Phenotypes:</b> variable, but many have extensive psychiatric phenotyping. |

## References

1. Psychiatric GWAS Consortium. Genome-wide association studies: history, rationale, and prospects for psychiatric disorders. *Am J Psychiatry*. 2009;166:540-546.
2. Neale BM, Medland SE, Ripke S, Asherson P, Franke B, Lesch KP, Faraone SV, Nguyen TT, Schafer H, Holmans P, Daly M, Steinhausen HC, Freitag C, Reif A, Renner TJ, Romanos M, Romanos J, Walitza S, Warnke A, Meyer J, Palmason H, Buitelaar J, Vasquez AA, Lambregts-Rommelse N, Gill M, Anney RJ, Langely K, O'Donovan M, Williams N, Owen M, Thapar A, Kent L, Sergeant J, Roeyers H, Mick E, Biederman J, Doyle A, Smalley S, Loo S, Hakonarson H, Elia J, Todorov A, Miranda A, Mulas F, Ebstein RP, Rothenberger A, Banaschewski T, Oades RD, Sonuga-Barke E, McGough J, Nisenbaum L, Middleton F, Hu X, Nelson S, ADHD Working Group of the Psychiatric GWAS Consortium. Meta-analysis of genome-wide association studies of attention-deficit/hyperactivity disorder. *J Am Acad Child Adolesc Psychiatry*. 2010;49:884-897.
3. Boraska V, Franklin CS, Floyd JA, Thornton LM, Huckins LM, Southam L, Rayner NW, Tachmazidou I, Klump KL, Treasure J, Lewis CM, Schmidt U, Tozzi F, Kiezebrink K, Hebebrand J, Gorwood P, Adan RA, Kas MJ, Favaro A, Santonastaso P, Fernandez-Aranda F, Gratacos M, Rybakowski F, Dmitrzak-Weglaz M, Kaprio J, Keski-Rahkonen A, Raevuori A, Van Furth EF, Slof-Op 't Landt MC, Hudson JI, Reichborn-Kjennerud T, Knudsen GP, Monteleone P, Kaplan AS, Karwautz A, Hakonarson H, Berrettini WH, Guo Y, Li D, Schork NJ, Komaki G, Ando T, Inoko H, Esko T, Fischer K, Mannik K, Metspalu A, Baker JH, Cone RD, Dackor J, DeSocio JE, Hilliard CE, O'Toole JK, Pantel J, Szatkiewicz JP, Taico C, Zerwas S, Trace SE, Davis OS, Helder S, Buhren K, Burghardt R, de Zwaan M, Egberts K, Ehrlich S, Herpertz-Dahlmann B, Herzog W, Imgart H, Scherag A, Scherag S, Zipfel S, Boni C, Ramos N, Versini A, Brandys MK, Danner UN, de Kovel C, Hendriks J, Koeleman BP, Ophoff RA, Strengman E, van Elburg AA, Bruson A, Clementi M, Degortes D, Forzan M, Tenconi E, Docampo E, Escaramis G, Jimenez-Murcia S, Lissowska J, Rajewski A, Szeszenia-Dabrowska N, Slopien A, Hauser J, Karhunen L, Meulenbelt I, Slagboom PE, Tortorella A, Maj M, Dedoussis G, Dikeos D, Gonidakis F, Tziouvas K, Tsitsika A, Papezova H, Slachtova L, Martaskova D, Kennedy JL, Levitan RD, Yilmaz Z, Huemer J, Koubek D, Merl E, Wagner G, Lichtenstein P, Breen G, Cohen-Woods S, Farmer A, McGuffin P, Cichon S, Giegling I, Herms S, Rujescu D, Schreiber S, Wichmann HE, Dina C, Sladek R, Gambaro G, Soranzo N, Julia A, Marsal S, Rabionet R, Gaborieau V, Dick DM, Palotie A, Ripatti S, Widen E, Andreassen OA, Espeseth T, Lundervold A, Reinvang I, Steen VM, Le Hellard S, Mattingsdal M, Ntalla I, Bencko V, Foretova L, Janout V, Navratilova M, Gallinger S, Pinto D, Scherer SW, Aschauer H, Carlberg L, Schosser A, Alfredsson L, Ding B, Klareskog L, Padyukov L, Courtet P, Guillaume S, Jaussent I, Finan C, Kalsi G, Roberts M, Logan DW, Peltonen L, Ritchie GR, Barrett JC, Wellcome Trust Case Control Consortium, Estivill X, Hinney A, Sullivan PF, Collier DA, Zeggini E, Bulik CM. A genome-wide association study of anorexia nervosa. *Mol Psychiatry*. 2014;19:1085-1094.
4. Cross-Disorder Group of the Psychiatric Genomics Consortium. Identification of risk loci with shared effects on five major psychiatric disorders: a genome-wide analysis. *Lancet*. 2013;381:1371-1379.
5. Psychiatric GWAS Consortium Bipolar Disorder Working Group. Large-scale genome-wide association analysis of bipolar disorder identifies a new susceptibility locus near ODZ4. *Nature genetics*. 2011;43:977-983.
6. Major Depressive Disorder Working Group of the PGC. A mega-analysis of genome-wide association studies for major depressive disorder. *Molecular Psychiatry*. 2013;18:497-511.
7. Yu D, Mathews CA, Scharf JM, Neale BM, Davis LK, Gamazon ER, Derks EM, Evans P, Edlund CK, Crane J, Fagerness JA, Osiecki L, Gallagher P, Gerber G, Haddad S, Illmann C, McGrath LM, Mayerfeld C, Arepalli S, Barlassina C, Barr CL, Bellodi L, Benarroch F, Berrio GB, Bienvenu OJ, Black DW, Bloch MH, Brentani H,

Bruun RD, Budman CL, Camarena B, Campbell DD, Cappi C, Silgado JC, Cavallini MC, Chavira DA, Chouinard S, Cook EH, Cookson MR, Coric V, Cullen B, Cusi D, Delorme R, Denys D, Dion Y, Eapen V, Egberts K, Falkai P, Fernandez T, Fournier E, Garrido H, Geller D, Gilbert DL, Girard SL, Grabe HJ, Grados MA, Greenberg BD, Gross-Tsur V, Grunblatt E, Hardy J, Heiman GA, Hemmings SM, Herrera LD, Hezel DM, Hoekstra PJ, Jankovic J, Kennedy JL, King RA, Konkashbaev AI, Kremeyer B, Kurlan R, Lanzagorta N, Leboyer M, Leckman JF, Lennertz L, Liu C, Lochner C, Lowe TL, Lupoli S, Macciardi F, Maier W, Manunta P, Marconi M, McCracken JT, Mesa Restrepo SC, Moessner R, Moorjani P, Morgan J, Muller H, Murphy DL, Naarden AL, Nurmi E, Ochoa WC, Ophoff RA, Pakstis AJ, Pato MT, Pato CN, Piacentini J, Pittenger C, Pollak Y, Rauch SL, Renner T, Reus VI, Richter MA, Riddle MA, Robertson MM, Romero R, Rosario MC, Rosenberg D, Ruhrmann S, Sabatti C, Salvi E, Sampaio AS, Samuels J, Sandor P, Service SK, Sheppard B, Singer HS, Smit JH, Stein DJ, Strengman E, Tischfield JA, Turiel M, Valencia Duarte AV, Vallada H, Veenstra-VanderWeele J, Walitza S, Wang Y, Weale M, Weiss R, Wendland JR, Westenberg HG, Shugart YY, Hounie AG, Miguel EC, Nicolini H, Wagner M, Ruiz-Linares A, Cath DC, McMahon W, Posthuma D, Oostra BA, Nestadt G, Rouleau GA, Purcell S, Jenike MA, Heutink P, Hanna GL, Conti DV, Arnold PD, Freimer NB, Stewart SE, Knowles JA, Cox NJ, Pauls DL. Cross-disorder genome-wide analyses suggest a complex genetic relationship between Tourette's syndrome and OCD. *Am J Psychiatry*. 2015;172:82-93.

8. Logue MW, Amstadter AB, Baker DG, Duncan L, Koenen KC, Liberzon I, Miller MW, Morey RA, Nievergelt CM, Ressler KJ, Smith AK, Smoller JW, Stein MB, Sumner JA, Uddin M. The Psychiatric Genomics Consortium Posttraumatic Stress Disorder Workgroup: Posttraumatic stress disorder enters the age of large-scale genomic collaboration. *Neuropsychopharmacology*. 2015;40:2287-2297.

9. Schizophrenia Working Group of the Psychiatric Genomics Consortium. Biological insights from 108 schizophrenia-associated genetic loci. *Nature*. 2014;511:421-427.

10. Moskvina V, Holmans P, Schmidt KM, Craddock N. Design of case-controls studies with unscreened controls. *Ann Hum Genet*. 2005;69:566-576.
